# Supplementary material for: Effects of humidity on the ultraviolet nanosensors of aligned electrospun ZnO nanofibers
Source: Royal Society of Chemistry journal article supplement (doi:10.1039/c3ra23420g), 2013-01-01
Supplement: c3ra23420g.pdf [file c3ra23420g.pdf]

# Effects of humidity on the ultraviolet nanosensors of aligned electrospun ZnO nanofibers

Chuilin Lai,<sup>a</sup> Xiaoxu Wang,<sup>b</sup> Yong Zhao,<sup>c</sup> Hao Fong,<sup>a,b,c,\*</sup> and Zhengtao Zhu<sup>a,b,c,\*</sup>

Supporting information:

## 1. Humidity Control of the Testing Chamber

The humidity in the chamber was controlled via adjusting the flow rates of two different air flows: one flow was synthetic dry air, and the other flow was wet air generated from bubbling the dry air through deionized (DI) water. The details of the air flows are shown in below table.

| RH  | Flow rates of two different air flows (sccm) |         |
|-----|----------------------------------------------|---------|
|     | Dry air                                      | Wet air |
| 10% | 300                                          | 0       |
| 44% | 150                                          | 150     |
| 63% | 100                                          | 200     |
| 75% | 30                                           | 270     |
| 81% | 0                                            | 300     |
